# Supplementary material for: Monitoring Human Milk β-Casein Phosphorylation and O-Glycosylation Over Lactation Reveals Distinct Differences between the Proteome and Endogenous Peptidome
Source: MDPI journal article supplement (doi:10.3390/ijms22158140), 2021-07-29
Supplement: s1 [file s1]

Supplemental Table S1: Glycoproteoforms detected between both donors across lactation for both low and high resolutions LC-MS experiments

| Detected proteoform                              | Theoretical mass (kDa) |          | Experimental mass (kDa; average $\pm$ stdev) |                     | Retention time apex (min; average $\pm$ stdev) |
|--------------------------------------------------|------------------------|----------|----------------------------------------------|---------------------|------------------------------------------------|
|                                                  | Monoisotopic           | Average  | Monoisotopic                                 | Average             |                                                |
| $\beta$ -casein 0P                               | 23842.82               | 23857.50 | 23843.05 $\pm$ 0.02                          | 23857.36 $\pm$ 0.19 | 16.71 $\pm$ 0.11                               |
| $\beta$ -casein 1P                               | 23922.79               | 23937.48 | 23923.00 $\pm$ 0.20                          | 23937.27 $\pm$ 0.16 | 16.83 $\pm$ 0.12                               |
| $\beta$ -casein 2P                               | 24002.75               | 24017.46 | 24002.97 $\pm$ 0.19                          | 24017.28 $\pm$ 0.10 | 17.06 $\pm$ 0.07                               |
| $\beta$ -casein 3P                               | 24082.72               | 24097.44 | 24082.94 $\pm$ 0.02                          | 24097.25 $\pm$ 0.09 | 17.28 $\pm$ 0.08                               |
| $\beta$ -casein 4P                               | 24162.69               | 24177.42 | 24162.90 $\pm$ 0.01                          | 24177.27 $\pm$ 0.09 | 17.51 $\pm$ 0.06                               |
| $\beta$ -casein 5P                               | 24242.65               | 24257.40 | 24242.88 $\pm$ 0.01                          | 24257.22 $\pm$ 0.08 | 17.81 $\pm$ 0.05                               |
| $\beta$ -casein 0P N <sub>1</sub>                | 24045.90               | 24060.69 | 24047.00 $\pm$ 0.03                          | 24062.20 $\pm$ 0.29 | 17.12 $\pm$ 0.09                               |
| $\beta$ -casein 0P N <sub>1</sub> H <sub>1</sub> | 24207.95               | 24222.84 | 24208.25 $\pm$ 0.47                          | 24223.32 $\pm$ 0.62 | 17.51 $\pm$ 0.19                               |
| $\beta$ -casein 1P N <sub>1</sub>                | 24125.87               | 24140.67 | 24126.42 $\pm$ 0.73                          | not detected        | 17.33 $\pm$ 0.05                               |
| $\beta$ -casein 1P N <sub>1</sub> H <sub>1</sub> | 24287.92               | 24302.82 | 24288.31 $\pm$ 0.50                          | 24302.97 $\pm$ 0.57 | 17.72 $\pm$ 0.42                               |
| $\beta$ -casein 2P N <sub>1</sub>                | 24205.83               | 24220.65 | 24205.03 $\pm$ 0.34                          | not detected        | 17.53 $\pm$ 0.08                               |
| $\beta$ -casein 2P N <sub>1</sub> H <sub>1</sub> | 24367.89               | 24382.80 | 24368.69 $\pm$ 0.60                          | 24383.22 $\pm$ 0.45 | 16.57 $\pm$ 0.14                               |
| $\beta$ -casein 3P N <sub>1</sub>                | 24285.80               | 24300.63 | 24284.89 $\pm$ 0.01                          | not detected        | 17.88 $\pm$ 0.00                               |
| $\beta$ -casein 3P N <sub>1</sub> H <sub>1</sub> | 24447.85               | 24462.78 | not detected                                 | 24464.17 $\pm$ 0.01 | 16.52 $\pm$ 0.21                               |
| $\beta$ -casein 4P N <sub>1</sub> H <sub>1</sub> | 24527.82               | 24542.76 | not detected                                 | 24542.32 $\pm$ 0.73 | 17.01 $\pm$ 0.12                               |
| $\beta$ -casein 4P N <sub>2</sub> H <sub>2</sub> | 24892.95               | 24908.09 | not detected                                 | 24907.34 $\pm$ 0.08 | 16.96 $\pm$ 0.00                               |

\*P is phosphorylation, H = hexose, N = N-acetylhexosamine

Supplemental Table S2: Curation criteria used to determine proper score settings reducing the FDR

| Filtering conditions                                  | Proteome derived data |            |               |                  | Peptidome derived data |            |               |                  |
|-------------------------------------------------------|-----------------------|------------|---------------|------------------|------------------------|------------|---------------|------------------|
|                                                       | NM* PSMs              | Glyco PSMs | False NM PSMs | False Glyco PSMs | NM PSMs                | Glyco PSMs | False NM PSMs | False Glyco PSMs |
| None                                                  | 73,278                | 18,488     | 11,839        | 6,783            | 86,174                 | 33,747     | 6,701         | 5,864            |
| Percent of total                                      | 25                    |            | 16            | 37               | 39                     |            | 8             | 17               |
| First AA > 15                                         | 71,747                | 17,285     | 10,943        | 6,274            | 79,612                 | 27,235     | 6,230         | 5,448            |
| Percent of total                                      | 24                    |            | 15            | 36               | 34                     |            | 8             | 20               |
| Score $\geq$ 150                                      | 50,047                | 61,89      | 310           | 26               | 58,367                 | 10,444     | 87            | 32               |
| Percent of total                                      | 12                    |            | 0.6           | 0.4              | 18                     |            | 0.1           | 0.3              |
| Score + log probability $\geq$ 1.5                    | 49,091                | 5,895      | 100           | 0                | 57,490                 | 99,50      | 14            | 7                |
| Percent of total                                      | 12                    |            | 0.2           | -                | 17                     |            | 0.02          | 0.07             |
| Score + log probability + Delta modification $\geq$ 5 | 44,667                | 2,286      | 97            | 0                | 48,295                 | 2,241      | 6             | 1                |
| Percent of total                                      | 5                     |            | 0.2           | -                | 5                      |            | 0.01          | 0.04             |

\*Non-modified (NM)

Supplemental Table S3: PSM counts of phospho- and glycosite modifications by donor and time in the peptidome and proteome derived data

| Donor one peptidome derived data |          |      |      |      |      |      |      |      |      |      |      |         |
|----------------------------------|----------|------|------|------|------|------|------|------|------|------|------|---------|
| Peptidome Phosphorylation        | Location | W1   | W2   | W3   | W4   | W6   | W8   | W10  | W12  | W16  | Sum  | Average |
|                                  | Thr18    | 21   | 42   | 78   | 43   | 49   | 70   | 80   | 50   | 75   | 508  | 56      |
|                                  | Ser21    | 405  | 278  | 460  | 319  | 345  | 398  | 429  | 405  | 428  | 3467 | 385     |
|                                  | Ser23    | 521  | 347  | 544  | 381  | 440  | 513  | 581  | 574  | 577  | 4478 | 498     |
|                                  | Ser24    | 607  | 462  | 664  | 526  | 568  | 708  | 783  | 826  | 826  | 5970 | 663     |
|                                  | Ser25    | 610  | 477  | 656  | 512  | 594  | 681  | 788  | 828  | 839  | 5985 | 665     |
|                                  | Ser28    |      | 4    | 1    | 2    | 4    | 2    | 7    | 4    | 5    | 29   | 4       |
|                                  | Thr30    |      | 1    |      |      |      |      |      |      |      | 1    | 1       |
|                                  | Thr207   | 11   | 8    |      |      | 9    | 3    | 1    |      |      | 32   | 6       |
|                                  | Thr214   | 1    | 5    |      |      | 3    |      |      |      |      | 9    | 3       |
|                                  | Ser225   |      |      |      |      |      |      |      |      |      | 0    | 0       |
|                                  | *Sum     | 2164 | 1606 | 2402 | 1781 | 1996 | 2370 | 2661 | 2683 | 2745 |      |         |
|                                  | *Average | 433  | 321  | 480  | 356  | 399  | 474  | 532  | 537  | 549  |      |         |
|                                  |          |      |      |      |      |      |      |      |      |      |      |         |
| Peptidome Glycosylation          | Location | W1   | W2   | W3   | W4   | W6   | W8   | W10  | W12  | W16  | Sum  | Average |
|                                  | Thr18    |      |      | 1    |      |      | 3    | 1    | 2    | 2    | 9    | 2       |
|                                  | Ser21    | 1    |      | 3    |      | 4    | 7    | 1    | 4    | 8    | 28   | 4       |
|                                  | Ser23    |      | 1    | 3    | 1    | 2    | 5    | 3    | 6    | 8    | 29   | 4       |
|                                  | Ser24    |      | 1    | 2    | 1    | 1    |      | 4    | 4    | 7    | 20   | 3       |
|                                  | Ser25    |      |      | 2    |      |      | 1    | 3    | 6    | 8    | 20   | 4       |
|                                  | Ser28    | 4    | 1    | 1    | 2    | 1    | 3    | 9    | 5    | 14   | 40   | 4       |
|                                  | Thr30    | 5    | 2    | 1    | 2    | 1    | 2    | 8    | 6    | 11   | 38   | 4       |
|                                  | Thr207   | 149  | 103  | 20   | 17   | 171  | 23   | 39   | 46   | 51   | 619  | 69      |
|                                  | Thr214   | 182  | 166  | 46   | 34   | 217  | 37   | 50   | 57   | 63   | 852  | 95      |
|                                  | Ser225   | 31   | 29   | 7    | 5    | 31   | 6    | 5    | 9    | 11   | 134  | 15      |
|                                  | *Sum     | 362  | 298  | 73   | 56   | 419  | 66   | 94   | 112  | 125  |      |         |
|                                  | *Average | 121  | 99   | 24   | 19   | 140  | 22   | 31   | 37   | 42   |      |         |
|                                  |          |      |      |      |      |      |      |      |      |      |      |         |
| Peptidome non-modified           | Location | W1   | W2   | W3   | W4   | W6   | W8   | W10  | W12  | W16  | Sum  | Average |
|                                  | Thr18    | 583  | 444  | 590  | 486  | 587  | 698  | 765  | 864  | 836  | 5853 | 650     |
|                                  | Ser21    | 215  | 229  | 233  | 244  | 330  | 411  | 476  | 575  | 544  | 3257 | 362     |
|                                  | Ser23    | 106  | 187  | 163  | 205  | 277  | 323  | 364  | 440  | 449  | 2514 | 279     |
|                                  | Ser24    | 25   | 79   | 46   | 64   | 159  | 141  | 171  | 201  | 216  | 1102 | 122     |
|                                  | Ser25    | 26   | 72   | 59   | 89   | 142  | 176  | 180  | 207  | 223  | 1174 | 130     |
|                                  | Ser28    | 639  | 553  | 720  | 612  | 738  | 871  | 974  | 1052 | 1067 | 7226 | 803     |
|                                  | Thr30    | 639  | 555  | 724  | 615  | 744  | 875  | 984  | 1057 | 1075 | 7268 | 808     |
|                                  | Thr207   | 765  | 733  | 259  | 203  | 721  | 228  | 247  | 286  | 381  | 3823 | 425     |
|                                  | Thr214   | 727  | 653  | 270  | 226  | 660  | 249  | 267  | 318  | 403  | 3773 | 419     |
|                                  | Ser225   | 737  | 688  | 312  | 253  | 709  | 279  | 309  | 342  | 424  | 4053 | 450     |
|                                  | Sum      | 6987 | 6124 | 4097 | 3555 | 7139 | 4859 | 5630 | 6319 | 7167 |      |         |
|                                  | Average  | 388  | 340  | 228  | 198  | 397  | 270  | 313  | 351  | 398  |      |         |

\* The Indicated Sum and Average were calculated using on sites that showed evidence of the respective PTM. For phosphosites, only Thr18-Ser25 were considered; for *O*-glycosylation, only sites Thr207-Ser225 were considered. Serine (Ser), Threonine (Thr), weeks (W)

| Donor one proteome derived data |          |      |      |      |      |      |      |      |      |      |      |         |
|---------------------------------|----------|------|------|------|------|------|------|------|------|------|------|---------|
|                                 | Location | W1   | W2   | W3   | W4   | W6   | W8   | W10  | W12  | W16  | Sum  | Average |
| Proteome Phosphorylation        | Thr18    |      |      |      | 3    | 1    |      |      |      |      | 4    | 2       |
|                                 | Ser21    | 15   | 3    | 67   | 81   | 6    |      | 23   | 7    | 12   | 214  | 27      |
|                                 | Ser23    | 50   | 51   | 140  | 150  | 47   | 42   | 78   | 76   | 82   | 716  | 80      |
|                                 | Ser24    | 103  | 125  | 253  | 287  | 187  | 138  | 221  | 235  | 226  | 1775 | 197     |
|                                 | Ser25    | 93   | 117  | 257  | 279  | 186  | 140  | 222  | 233  | 228  | 1755 | 195     |
|                                 | Ser28    |      |      |      |      |      |      |      | 1    |      | 1    | 1       |
|                                 | Thr30    |      |      |      |      |      |      |      |      |      | 0    | 0       |
|                                 | Thr207   | 1    | 6    | 1    | 5    |      |      | 3    | 2    | 1    | 19   | 3       |
|                                 | Thr214   |      | 1    | 1    |      |      |      |      |      |      | 2    | 1       |
|                                 | Ser225   |      | 1    | 1    | 2    |      | 1    |      | 2    | 2    | 9    | 2       |
|                                 | *Sum     | 261  | 296  | 717  | 800  | 427  | 320  | 544  | 551  | 548  |      |         |
|                                 | *Average | 261  | 74   | 179  | 160  | 85   | 107  | 136  | 138  | 137  |      |         |
|                                 |          |      |      |      |      |      |      |      |      |      |      |         |
|                                 | Location | W1   | W2   | W3   | W4   | W6   | W8   | W10  | W12  | W16  | Sum  | Average |
| Proteome Glycosylation          | Thr18    |      |      | 1    |      |      |      |      |      |      | 1    | 1       |
|                                 | Ser21    |      |      | 2    |      |      |      |      |      |      | 2    | 2       |
|                                 | Ser23    |      |      | 2    |      |      |      |      |      |      | 2    | 2       |
|                                 | Ser24    |      |      | 2    | 2    | 1    | 1    | 1    | 2    | 1    | 10   | 1       |
|                                 | Ser25    |      |      | 1    | 2    | 1    | 1    | 1    | 2    | 1    | 9    | 1       |
|                                 | Ser28    |      |      | 1    |      |      |      |      | 1    |      | 2    | 1       |
|                                 | Thr30    |      |      | 1    |      |      |      |      | 1    |      | 2    | 1       |
|                                 | Thr207   | 55   | 66   | 88   | 119  | 74   | 96   | 99   | 105  | 111  | 813  | 90      |
|                                 | Thr214   | 100  | 103  | 115  | 148  | 88   | 141  | 125  | 124  | 138  | 1082 | 120     |
|                                 | Ser225   | 9    | 16   | 13   | 24   | 14   | 23   | 14   | 18   | 26   | 157  | 17      |
|                                 | *Sum     | 164  | 185  | 216  | 291  | 176  | 260  | 238  | 247  | 275  |      |         |
|                                 | *Average | 55   | 62   | 72   | 97   | 59   | 87   | 79   | 82   | 92   |      |         |
|                                 |          |      |      |      |      |      |      |      |      |      |      |         |
|                                 | Location | W1   | W2   | W3   | W4   | W6   | W8   | W10  | W12  | W16  | Sum  | Average |
| Proteome non-modified           | Thr18    | 100  | 129  | 264  | 303  | 203  | 149  | 234  | 272  | 266  | 1920 | 213     |
|                                 | Ser21    | 99   | 143  | 218  | 250  | 216  | 166  | 238  | 285  | 271  | 1886 | 210     |
|                                 | Ser23    | 67   | 101  | 151  | 192  | 184  | 134  | 189  | 226  | 211  | 1455 | 162     |
|                                 | Ser24    | 16   | 27   | 39   | 55   | 44   | 39   | 46   | 68   | 69   | 403  | 45      |
|                                 | Ser25    | 26   | 36   | 38   | 65   | 45   | 37   | 46   | 72   | 69   | 434  | 48      |
|                                 | Ser28    | 124  | 157  | 298  | 348  | 236  | 181  | 274  | 308  | 301  | 2227 | 247     |
|                                 | Thr30    | 124  | 157  | 298  | 348  | 236  | 181  | 274  | 309  | 301  | 2228 | 248     |
|                                 | Thr207   | 573  | 735  | 755  | 808  | 505  | 679  | 593  | 656  | 668  | 5972 | 664     |
|                                 | Thr214   | 494  | 655  | 697  | 760  | 414  | 611  | 526  | 589  | 607  | 5353 | 595     |
|                                 | Ser225   | 493  | 618  | 712  | 788  | 346  | 647  | 559  | 609  | 635  | 5407 | 601     |
|                                 | Sum      | 3212 | 4268 | 5193 | 5655 | 3484 | 4183 | 4162 | 5029 | 4903 |      |         |
|                                 | Average  | 178  | 237  | 289  | 314  | 194  | 232  | 231  | 279  | 272  |      |         |

\* The Indicated Sum and Average were calculated using on sites that showed evidence of the respective PTM. For phosphosites, only Thr18-Ser25 were considered; for *O*-glycosylation, only sites Thr207-Ser225 were considered. Serine (Ser), Threonine (Thr), weeks (W)

| Donor two peptidome derived data |          |      |      |      |      |      |      |      |      |      |       |         |
|----------------------------------|----------|------|------|------|------|------|------|------|------|------|-------|---------|
| Peptidome Phosphorylation        | Location | W1   | W2   | W3   | W4   | W6   | W8   | W10  | W12  | W16  | Sum   | Average |
|                                  | Thr18    | 107  | 52   | 59   | 13   | 79   | 62   | 44   | 28   | 10   | 454   | 50      |
|                                  | Ser21    | 508  | 368  | 390  | 209  | 454  | 382  | 339  | 210  | 208  | 3068  | 341     |
|                                  | Ser23    | 631  | 486  | 520  | 357  | 629  | 568  | 495  | 339  | 295  | 4320  | 480     |
|                                  | Ser24    | 769  | 695  | 797  | 743  | 973  | 932  | 945  | 676  | 751  | 7281  | 809     |
|                                  | Ser25    | 775  | 685  | 770  | 846  | 926  | 867  | 908  | 664  | 738  | 7179  | 798     |
|                                  | Ser28    | 8    | 6    | 6    | 12   | 7    | 21   | 6    | 12   | 6    | 84    | 9       |
|                                  | Thr30    |      |      |      |      |      |      | 1    |      | 1    | 2     | 1       |
|                                  | Thr207   | 3    |      |      |      |      |      |      |      |      | 3     | 3       |
|                                  | Thr214   |      |      |      |      |      |      |      |      |      | 0     | 0       |
|                                  | Ser225   |      | 1    |      |      |      |      |      |      |      | 1     | 1       |
|                                  | *Sum     | 2790 | 2286 | 2536 | 2168 | 3061 | 2811 | 2731 | 1917 | 2002 |       |         |
|                                  | *Average | 2691 | 457  | 507  | 434  | 612  | 562  | 546  | 383  | 400  |       |         |
|                                  |          |      |      |      |      |      |      |      |      |      |       |         |
| Peptidome Glycosylation          | Location | W1   | W2   | W3   | W4   | W6   | W8   | W10  | W12  | W16  | Sum   | Average |
|                                  | Thr18    | 5    | 5    | 3    | 7    |      | 3    | 5    | 7    | 4    | 39    | 5       |
|                                  | Ser21    | 6    | 10   | 6    | 8    | 1    | 3    | 8    | 11   | 6    | 59    | 7       |
|                                  | Ser23    | 6    | 9    | 6    | 8    | 1    | 3    | 9    | 11   | 9    | 62    | 7       |
|                                  | Ser24    | 1    | 7    | 3    | 6    | 3    | 4    | 7    | 6    | 6    | 43    | 5       |
|                                  | Ser25    | 1    | 4    | 4    | 4    | 3    | 2    | 7    | 3    | 7    | 35    | 4       |
|                                  | Ser28    | 2    | 4    | 6    | 7    | 6    | 5    | 10   | 3    | 8    | 51    | 6       |
|                                  | Thr30    | 2    | 5    | 4    | 5    | 6    | 5    | 10   | 3    | 6    | 46    | 5       |
|                                  | Thr207   | 144  | 151  | 43   | 29   | 57   | 45   | 40   | 11   | 26   | 546   | 61      |
|                                  | Thr214   | 184  | 177  | 58   | 44   | 87   | 61   | 54   | 21   | 37   | 723   | 80      |
|                                  | Ser225   | 13   | 17   |      | 6    | 13   | 9    | 3    | 1    | 2    | 64    | 8       |
|                                  | *Sum     | 341  | 345  | 101  | 79   | 157  | 115  | 97   | 33   | 65   |       |         |
|                                  | *Average | 114  | 115  | 51   | 26   | 52   | 38   | 32   | 11   | 22   |       |         |
|                                  |          |      |      |      |      |      |      |      |      |      |       |         |
| Peptidome non-modified           | Location | W1   | W2   | W3   | W4   | W6   | W8   | W10  | W12  | W16  | Sum   | Average |
|                                  | Thr18    | 655  | 692  | 776  | 1271 | 1044 | 1062 | 1145 | 925  | 1135 | 8705  | 967     |
|                                  | Ser21    | 308  | 436  | 512  | 1161 | 745  | 817  | 943  | 831  | 1002 | 6755  | 751     |
|                                  | Ser23    | 209  | 352  | 426  | 1062 | 639  | 688  | 859  | 739  | 969  | 5943  | 660     |
|                                  | Ser24    | 81   | 155  | 166  | 701  | 309  | 342  | 428  | 425  | 532  | 3139  | 349     |
|                                  | Ser25    | 78   | 175  | 206  | 617  | 373  | 419  | 483  | 457  | 565  | 3373  | 375     |
|                                  | Ser28    | 851  | 865  | 985  | 1483 | 1311 | 1274 | 1407 | 1124 | 1313 | 10613 | 1179    |
|                                  | Thr30    | 859  | 870  | 998  | 1500 | 1319 | 1296 | 1417 | 1139 | 1324 | 10722 | 1191    |
|                                  | Thr207   | 571  | 653  | 296  | 201  | 380  | 295  | 279  | 168  | 235  | 3078  | 342     |
|                                  | Thr214   | 553  | 652  | 315  | 217  | 378  | 298  | 291  | 177  | 255  | 3136  | 348     |
|                                  | Ser225   | 610  | 652  | 340  | 258  | 412  | 328  | 320  | 184  | 286  | 3390  | 377     |
|                                  | Sum      | 7671 | 7903 | 6201 | 9508 | 8561 | 8020 | 8855 | 7030 | 8536 |       |         |
|                                  | Average  | 426  | 439  | 345  | 528  | 476  | 446  | 492  | 391  | 474  |       |         |

\* The Indicated Sum and Average were calculated using on sites that showed evidence of the respective PTM. For phosphosites, only Thr18-Ser25 were considered; for *O*-glycosylation, only sites Thr207-Ser225 were considered. Serine (Ser), Threonine (Thr), weeks (W)

| Donor two proteome derived data |          |      |      |      |      |      |      |      |      |      |      |         |
|---------------------------------|----------|------|------|------|------|------|------|------|------|------|------|---------|
|                                 | Location | W1   | W2   | W3   | W4   | W6   | W8   | W10  | W12  | W16  | Sum  | Average |
| Proteome Phosphorylation        | Thr18    | 2    |      |      |      |      |      |      |      | 2    | 4    | 2       |
|                                 | Ser21    | 150  | 73   | 49   | 22   | 1    | 1    | 2    | 1    | 3    | 302  | 34      |
|                                 | Ser23    | 207  | 147  | 114  | 80   | 44   | 84   | 53   | 49   | 49   | 827  | 92      |
|                                 | Ser24    | 286  | 249  | 280  | 234  | 155  | 282  | 241  | 261  | 259  | 2247 | 250     |
|                                 | Ser25    | 282  | 247  | 273  | 229  | 155  | 283  | 240  | 267  | 251  | 2227 | 247     |
|                                 | Ser28    |      |      | 2    | 1    |      |      |      | 1    |      | 4    | 1       |
|                                 | Thr30    |      |      |      |      |      |      |      |      |      | 0    | 0       |
|                                 | Thr207   | 1    | 1    | 1    |      | 1    | 5    |      |      |      | 9    | 2       |
|                                 | Thr214   |      | 1    |      |      |      |      |      |      |      | 1    | 1       |
|                                 | Ser225   |      |      | 1    |      |      |      |      |      |      | 1    | 1       |
|                                 | *Sum     | 927  | 716  | 716  | 565  | 355  | 650  | 536  | 578  | 564  |      |         |
|                                 | *Average | 925  | 179  | 179  | 141  | 89   | 163  | 134  | 145  | 113  |      |         |
|                                 | Location | W1   | W2   | W3   | W4   | W6   | W8   | W10  | W12  | W16  | Sum  | Average |
| Proteome Glycosylation          | Thr18    |      |      |      |      |      |      |      |      |      | 0    | 0       |
|                                 | Ser21    | 1    |      |      |      |      |      |      |      |      | 1    | 1       |
|                                 | Ser23    | 1    |      |      |      |      | 1    |      |      |      | 2    | 1       |
|                                 | Ser24    |      |      | 1    | 1    | 2    | 2    | 1    | 1    | 1    | 9    | 1       |
|                                 | Ser25    |      |      | 1    | 1    | 2    | 2    | 1    | 1    | 1    | 9    | 1       |
|                                 | Ser28    | 1    |      |      |      |      | 2    |      | 1    | 1    | 5    | 1       |
|                                 | Thr30    | 1    |      |      |      |      | 2    |      | 1    | 1    | 5    | 1       |
|                                 | Thr207   | 44   | 77   | 64   | 50   | 55   | 66   | 36   | 34   | 39   | 465  | 52      |
|                                 | Thr214   | 74   | 100  | 98   | 78   | 82   | 97   | 57   | 53   | 70   | 709  | 79      |
|                                 | Ser225   | 13   | 20   | 17   | 11   | 18   | 10   | 14   | 13   | 10   | 126  | 14      |
|                                 | *Sum     | 131  | 197  | 179  | 139  | 155  | 173  | 107  | 100  | 119  |      |         |
|                                 | *Average | 44   | 66   | 60   | 46   | 52   | 58   | 36   | 33   | 40   |      |         |
|                                 | Location | W1   | W2   | W3   | W4   | W6   | W8   | W10  | W12  | W16  | Sum  | Average |
| Proteome non-modified           | Thr18    | 295  | 273  | 315  | 263  | 189  | 364  | 308  | 354  | 335  | 2696 | 300     |
|                                 | Ser21    | 157  | 221  | 284  | 263  | 208  | 382  | 324  | 375  | 360  | 2574 | 286     |
|                                 | Ser23    | 104  | 156  | 228  | 216  | 176  | 309  | 286  | 340  | 329  | 2144 | 238     |
|                                 | Ser24    | 27   | 56   | 64   | 63   | 66   | 114  | 101  | 130  | 121  | 742  | 82      |
|                                 | Ser25    | 32   | 59   | 73   | 70   | 68   | 113  | 105  | 125  | 132  | 777  | 86      |
|                                 | Ser28    | 318  | 309  | 349  | 304  | 229  | 400  | 350  | 392  | 384  | 3035 | 337     |
|                                 | Thr30    | 318  | 309  | 351  | 305  | 229  | 400  | 350  | 393  | 384  | 3039 | 338     |
|                                 | Thr207   | 435  | 503  | 514  | 476  | 445  | 612  | 299  | 390  | 421  | 4095 | 455     |
|                                 | Thr214   | 397  | 482  | 478  | 446  | 411  | 582  | 273  | 367  | 390  | 3826 | 425     |
|                                 | Ser225   | 402  | 480  | 504  | 463  | 429  | 588  | 295  | 378  | 411  | 3950 | 439     |
|                                 | Sum      | 3379 | 4022 | 4348 | 4011 | 3529 | 5268 | 3700 | 4421 | 4414 |      |         |
|                                 | Average  | 188  | 223  | 242  | 223  | 196  | 293  | 206  | 246  | 245  |      |         |

\* The Indicated Sum and Average were calculated using on sites that showed evidence of the respective PTM. For phosphosites, only Thr18-Ser25 were considered; for *O*-glycosylation, only sites Thr207-Ser225 were considered. Serine (Ser), Threonine (Thr), weeks (W)

Supplemental Table S4: PSM percentage of phospho- and glycosite modifications by donor and time in the peptidome and proteome derived data

| Donor one peptidome       |                 |            |            |            |            |            |            |            |            |            |     |         |
|---------------------------|-----------------|------------|------------|------------|------------|------------|------------|------------|------------|------------|-----|---------|
| Peptidome Phosphorylation | Location        | W1         | W2         | W3         | W4         | W6         | W8         | W10        | W12        | W16        | Sum | Average |
|                           | Thr18           | 3          | 9          | 12         | 8          | 8          | 9          | 9          | 5          | 8          | 72  | 8       |
|                           | Ser21           | 65         | 55         | 66         | 57         | 51         | 49         | 47         | 41         | 44         | 476 | 53      |
|                           | Ser23           | 83         | 65         | 77         | 65         | 61         | 61         | 61         | 57         | 56         | 587 | 65      |
|                           | Ser24           | 96         | 85         | 94         | 89         | 78         | 83         | 82         | 80         | 79         | 767 | 85      |
|                           | Ser25           | 96         | 87         | 92         | 85         | 81         | 79         | 81         | 80         | 79         | 760 | 84      |
|                           | Ser28           |            | 1          |            |            | 1          |            | 1          |            |            | 4   | 0       |
|                           | Thr30           |            |            |            |            |            |            |            |            |            | 0   | 0       |
|                           | Thr207          | 1          | 1          |            |            | 1          | 1          |            |            |            | 5   | 1       |
|                           | Thr214          |            | 1          |            |            |            |            |            |            |            | 1   | 0       |
|                           | Ser225          |            |            |            |            |            |            |            |            |            | 0   | 0       |
|                           | <b>*Sum</b>     | <b>344</b> | <b>301</b> | <b>340</b> | <b>304</b> | <b>279</b> | <b>283</b> | <b>282</b> | <b>264</b> | <b>267</b> |     |         |
|                           | <b>*Average</b> | <b>69</b>  | <b>60</b>  | <b>68</b>  | <b>61</b>  | <b>56</b>  | <b>57</b>  | <b>56</b>  | <b>53</b>  | <b>53</b>  |     |         |
|                           |                 |            |            |            |            |            |            |            |            |            |     |         |
| Peptidome Glycosylation   | Location        | W1         | W2         | W3         | W4         | W6         | W8         | W10        | W12        | W16        | Sum | Average |
|                           | Thr18           |            |            |            |            |            |            |            |            |            | 1   | 0       |
|                           | Ser21           |            |            | 1          |            | 1          | 2          |            | 1          | 1          | 7   | 1       |
|                           | Ser23           |            | 1          | 2          |            | 1          | 2          | 1          | 1          | 2          | 9   | 1       |
|                           | Ser24           |            | 1          | 4          | 2          | 1          |            | 2          | 2          | 3          | 15  | 2       |
|                           | Ser25           |            |            | 3          |            |            | 1          | 2          | 3          | 3          | 12  | 1       |
|                           | Ser28           | 1          |            |            |            |            |            | 1          |            | 1          | 4   | 0       |
|                           | Thr30           | 1          |            |            |            |            |            | 1          | 1          | 1          | 4   | 0       |
|                           | Thr207          | 16         | 12         | 7          | 8          | 19         | 9          | 14         | 14         | 12         | 111 | 12      |
|                           | Thr214          | 20         | 20         | 15         | 13         | 25         | 13         | 16         | 15         | 14         | 150 | 17      |
|                           | Ser225          | 4          | 4          | 2          | 2          | 4          | 2          | 2          | 3          | 3          | 25  | 3       |
|                           | <b>*Sum</b>     | <b>40</b>  | <b>37</b>  | <b>24</b>  | <b>23</b>  | <b>48</b>  | <b>24</b>  | <b>31</b>  | <b>32</b>  | <b>28</b>  |     |         |
|                           | <b>*Average</b> | <b>13</b>  | <b>12</b>  | <b>8</b>   | <b>8</b>   | <b>16</b>  | <b>8</b>   | <b>10</b>  | <b>11</b>  | <b>9</b>   |     |         |

\* The Indicated Sum and Average were calculated using on sites that showed evidence of the respective PTM. For phosphosites, only Thr18-Ser25 were considered; for *O*-glycosylation, only sites Thr207-Ser225 were considered. Serine (Ser), Threonine (Thr), weeks (W)

| Donor one proteome derived data |          |     |     |     |     |     |     |     |     |     |     |         |
|---------------------------------|----------|-----|-----|-----|-----|-----|-----|-----|-----|-----|-----|---------|
|                                 | Location | W1  | W2  | W3  | W4  | W6  | W8  | W10 | W12 | W16 | Sum | Average |
| Proteome Phosphorylation        | Thr18    |     |     |     | 1   |     |     |     |     |     | 1   | 0       |
|                                 | Ser21    | 13  | 2   | 24  | 24  | 3   |     | 9   | 2   | 4   | 81  | 9       |
|                                 | Ser23    | 43  | 34  | 48  | 44  | 20  | 24  | 29  | 25  | 28  | 295 | 33      |
|                                 | Ser24    | 87  | 82  | 87  | 84  | 81  | 78  | 83  | 78  | 77  | 735 | 82      |
|                                 | Ser25    | 78  | 76  | 87  | 81  | 81  | 79  | 83  | 76  | 77  | 718 | 80      |
|                                 | Ser28    |     |     |     |     |     |     |     |     |     | 0   | 0       |
|                                 | Thr30    |     |     |     |     |     |     |     |     |     | 0   | 0       |
|                                 | Thr207   |     | 1   |     | 1   |     |     | 1   |     |     | 3   | 0       |
|                                 | Thr214   |     |     |     |     |     |     |     |     |     | 0   | 0       |
|                                 | Ser225   |     |     |     |     |     |     |     |     |     | 1   | 0       |
|                                 | *Sum     | 221 | 194 | 245 | 234 | 185 | 181 | 204 | 182 | 186 |     |         |
|                                 | *Average | 44  | 39  | 49  | 47  | 37  | 36  | 41  | 36  | 37  |     |         |
|                                 |          |     |     |     |     |     |     |     |     |     |     |         |
|                                 | Location | W1  | W2  | W3  | W4  | W6  | W8  | W10 | W12 | W16 | Sum | Average |
| Proteome Glycosylation          | Thr18    |     |     |     |     |     |     |     |     |     | 0   | 0       |
|                                 | Ser21    |     |     | 1   |     |     |     |     |     |     | 1   | 0       |
|                                 | Ser23    |     |     | 1   |     |     |     |     |     |     | 1   | 0       |
|                                 | Ser24    |     |     | 5   | 4   | 2   | 3   | 2   | 3   | 1   | 20  | 2       |
|                                 | Ser25    |     |     | 3   | 3   | 2   | 3   | 2   | 3   | 1   | 17  | 2       |
|                                 | Ser28    |     |     |     |     |     |     |     |     |     | 1   | 0       |
|                                 | Thr30    |     |     |     |     |     |     |     |     |     | 1   | 0       |
|                                 | Thr207   | 9   | 8   | 10  | 13  | 13  | 12  | 14  | 14  | 14  | 108 | 12      |
|                                 | Thr214   | 17  | 14  | 14  | 16  | 18  | 19  | 19  | 17  | 19  | 152 | 17      |
|                                 | Ser225   | 2   | 3   | 2   | 3   | 4   | 3   | 2   | 3   | 4   | 26  | 3       |
|                                 | *Sum     | 27  | 24  | 26  | 32  | 34  | 35  | 36  | 34  | 37  |     |         |
|                                 | *Average | 9   | 8   | 9   | 11  | 11  | 12  | 12  | 11  | 12  |     |         |

\* The Indicated Sum and Average were calculated using on sites that showed evidence of the respective PTM. For phosphosites, only Thr18-Ser25 were considered; for *O*-glycosylation, only sites Thr207-Ser225 were considered. Serine (Ser), Threonine (Thr), weeks (W)



| Donor two peptidome derived data |                 |            |            |            |            |            |            |            |            |            |     |         |
|----------------------------------|-----------------|------------|------------|------------|------------|------------|------------|------------|------------|------------|-----|---------|
| Peptidome Phosphorylation        | Location        | W1         | W2         | W3         | W4         | W6         | W8         | W10        | W12        | W16        | Sum | Average |
|                                  | Thr18           | 14         | 7          | 7          | 1          | 7          | 6          | 4          | 3          | 1          | 49  | 5       |
|                                  | Ser21           | 62         | 46         | 43         | 15         | 38         | 32         | 26         | 20         | 17         | 300 | 33      |
|                                  | Ser23           | 75         | 58         | 55         | 25         | 50         | 45         | 37         | 31         | 23         | 399 | 44      |
|                                  | Ser24           | 90         | 82         | 83         | 51         | 76         | 73         | 69         | 61         | 59         | 644 | 72      |
|                                  | Ser25           | 91         | 80         | 79         | 58         | 71         | 67         | 65         | 59         | 57         | 627 | 70      |
|                                  | Ser28           | 1          | 1          | 1          | 1          | 1          | 2          |            | 1          |            | 7   | 1       |
|                                  | Thr30           |            |            |            |            |            |            |            |            |            | 0   | 0       |
|                                  | Thr207          | 1          |            |            |            |            |            |            |            |            | 1   | 0       |
|                                  | Thr214          |            |            |            |            |            |            |            |            |            | 0   | 0       |
|                                  | Ser225          |            |            |            |            |            |            |            |            |            | 0   | 0       |
|                                  | <b>*Sum</b>     | <b>333</b> | <b>272</b> | <b>267</b> | <b>151</b> | <b>242</b> | <b>223</b> | <b>201</b> | <b>175</b> | <b>157</b> |     |         |
|                                  | <b>*Average</b> | <b>67</b>  | <b>54</b>  | <b>53</b>  | <b>30</b>  | <b>48</b>  | <b>45</b>  | <b>40</b>  | <b>35</b>  | <b>31</b>  |     |         |
|                                  |                 |            |            |            |            |            |            |            |            |            |     |         |
| Peptidome Glycosylation          | Location        | W1         | W2         | W3         | W4         | W6         | W8         | W10        | W12        | W16        | Sum | Average |
|                                  | Thr18           | 1          | 1          |            | 1          |            |            |            | 1          |            | 4   | 0       |
|                                  | Ser21           | 2          | 2          | 1          | 1          |            |            | 1          | 1          | 1          | 9   | 1       |
|                                  | Ser23           | 3          | 2          | 1          | 1          |            |            | 1          | 1          | 1          | 11  | 1       |
|                                  | Ser24           | 1          | 4          | 2          | 1          | 1          | 1          | 2          | 1          | 1          | 14  | 2       |
|                                  | Ser25           | 1          | 2          | 2          | 1          | 1          |            | 1          | 1          | 1          | 11  | 1       |
|                                  | Ser28           |            |            | 1          |            |            |            | 1          |            | 1          | 4   | 0       |
|                                  | Thr30           |            | 1          |            |            |            |            | 1          |            |            | 4   | 0       |
|                                  | Thr207          | 20         | 19         | 13         | 13         | 13         | 13         | 13         | 6          | 10         | 119 | 13      |
|                                  | Thr214          | 25         | 21         | 16         | 17         | 19         | 17         | 16         | 11         | 13         | 153 | 17      |
|                                  | Ser225          | 2          | 3          |            | 2          | 3          | 3          | 1          | 1          | 1          | 15  | 2       |
|                                  | <b>*Sum</b>     | <b>47</b>  | <b>43</b>  | <b>28</b>  | <b>32</b>  | <b>35</b>  | <b>33</b>  | <b>29</b>  | <b>17</b>  | <b>23</b>  |     |         |
|                                  | <b>*Average</b> | <b>16</b>  | <b>14</b>  | <b>9</b>   | <b>11</b>  | <b>12</b>  | <b>11</b>  | <b>10</b>  | <b>6</b>   | <b>8</b>   |     |         |

\* The Indicated Sum and Average were calculated using on sites that showed evidence of the respective PTM. For phosphosites, only Thr18-Ser25 were considered; for *O*-glycosylation, only sites Thr207-Ser225 were considered. Serine (Ser), Threonine (Thr), weeks (W)

| Donor two proteome derived data |          |     |     |     |     |     |     |     |     |     |     |         |
|---------------------------------|----------|-----|-----|-----|-----|-----|-----|-----|-----|-----|-----|---------|
|                                 | Location | W1  | W2  | W3  | W4  | W6  | W8  | W10 | W12 | W16 | Sum | Average |
| Proteome Phosphorylation        | Thr18    | 1   |     |     |     |     |     |     |     | 1   | 1   | 0       |
|                                 | Ser21    | 49  | 25  | 15  | 8   |     |     | 1   |     | 1   | 99  | 11      |
|                                 | Ser23    | 67  | 49  | 33  | 27  | 20  | 21  | 16  | 13  | 13  | 258 | 29      |
|                                 | Ser24    | 91  | 82  | 81  | 79  | 70  | 71  | 70  | 67  | 68  | 680 | 76      |
|                                 | Ser25    | 90  | 81  | 79  | 77  | 70  | 71  | 70  | 68  | 66  | 670 | 74      |
|                                 | Ser28    |     |     | 1   |     |     |     |     |     |     | 1   | 0       |
|                                 | Thr30    |     |     |     |     |     |     |     |     |     | 0   | 0       |
|                                 | Thr207   |     |     |     |     |     | 1   |     |     |     | 2   | 0       |
|                                 | Thr214   |     |     |     |     |     |     |     |     |     | 0   | 0       |
|                                 | Ser225   |     |     |     |     |     |     |     |     |     | 0   | 0       |
|                                 | *Sum     | 297 | 236 | 208 | 190 | 160 | 164 | 156 | 148 | 148 |     |         |
|                                 | *Average | 59  | 47  | 42  | 38  | 32  | 33  | 31  | 30  | 30  |     |         |
|                                 |          |     |     |     |     |     |     |     |     |     |     |         |
|                                 | Location | W1  | W2  | W3  | W4  | W6  | W8  | W10 | W12 | W16 | Sum | Average |
| Proteome Glycosylation          | Thr18    |     |     |     |     |     |     |     |     |     | 0   | 0       |
|                                 | Ser21    | 1   |     |     |     |     |     |     |     |     | 1   | 0       |
|                                 | Ser23    | 1   |     |     |     |     |     |     |     |     | 1   | 0       |
|                                 | Ser24    |     |     | 2   | 2   | 3   | 2   | 1   | 1   | 1   | 10  | 1       |
|                                 | Ser25    |     |     | 1   | 1   | 3   | 2   | 1   | 1   | 1   | 10  | 1       |
|                                 | Ser28    |     |     |     |     |     |     |     |     |     | 1   | 0       |
|                                 | Thr30    |     |     |     |     |     |     |     |     |     | 1   | 0       |
|                                 | Thr207   | 9   | 13  | 11  | 10  | 11  | 10  | 11  | 8   | 8   | 91  | 10      |
|                                 | Thr214   | 16  | 17  | 17  | 15  | 17  | 14  | 17  | 13  | 15  | 141 | 16      |
|                                 | Ser225   | 3   | 4   | 3   | 2   | 4   | 2   | 5   | 3   | 2   | 29  | 3       |
|                                 | *Sum     | 28  | 34  | 31  | 27  | 32  | 26  | 33  | 24  | 26  |     |         |
|                                 | *Average | 9   | 11  | 10  | 9   | 11  | 9   | 11  | 8   | 9   |     |         |

\* The Indicated Sum and Average were calculated using on sites that showed evidence of the respective PTM. For phosphosites, only Thr18-Ser25 were considered; for *O*-glycosylation, only sites Thr207-Ser225 were considered. Serine (Ser), Threonine (Thr), weeks (W)

Supplemental Table S5: Observed Skyline MS1 glycopeptide percentages of the ladder peptide from (<sup>190</sup>AVPVQALLLNQ... to <sup>200</sup>QELLLNPTHQIYPVTQPLAPVHNPISV<sub>226</sub>) for donor one over lactation in the proteome and peptidome derived data

| Proteome derived data                                                                                 |           |           |           |           |           |           |            |            |            |
|-------------------------------------------------------------------------------------------------------|-----------|-----------|-----------|-----------|-----------|-----------|------------|------------|------------|
|                                                                                                       | Week<br>1 | Week<br>2 | Week<br>3 | Week<br>4 | Week<br>6 | Week<br>8 | Week<br>10 | Week<br>12 | Week<br>16 |
| <sup>190</sup> AVPVQALLLNQELLLNPTHQIYPVTQPLAPVHNPISV <sub>226</sub>                                   |           |           |           |           |           |           |            |            |            |
| AVPVQALLLNQELLLNPT[N <sub>1</sub> H <sub>1</sub> ]HQIYPVTQPLAPVHNPISV                                 | 1         | 2         | 2         | 3         | 1         | 2         | 2          | 2          | 3          |
| AVPVQALLLNQELLLNPT[N <sub>1</sub> H <sub>1</sub> ]HQIYPVT[N <sub>1</sub> H <sub>1</sub> ]QPLAPVHNPISV | 1         | 1         | 2         | 4         | 1         | 3         | 3          | 3          | 3          |
| <sup>196</sup> LLLNQELLLNPTHQIYPVTQPLAPVHNPISV <sub>226</sub>                                         |           |           |           |           |           |           |            |            |            |
| LLLNQELLLNPT[N <sub>1</sub> H <sub>1</sub> ]HQIYPVTQPLAPVHNPISV                                       | 1         | 1         | 1         | 1         | 1         | 1         | 1          | 1          | 1          |
| LLLNQELLLNPT[N <sub>1</sub> H <sub>1</sub> ]HQIYPVT[N <sub>1</sub> H <sub>1</sub> ]QPLAPVHNPISV       | 0         | 0         | 0         | 1         | 0         | 0         | 0          | 1          | 0          |
| <sup>197</sup> LLLNQELLLNPTHQIYPVTQPLAPVHNPISV <sub>226</sub>                                         |           |           |           |           |           |           |            |            |            |
| LLLNQELLLNPT[N <sub>1</sub> H <sub>1</sub> ]HQIYPVTQPLAPVHNPISV                                       | 1         | 1         | 1         | 1         | 1         | 1         | 1          | 1          | 1          |
| LLLNQELLLNPT[N <sub>1</sub> H <sub>1</sub> ]HQIYPVT[N <sub>1</sub> H <sub>1</sub> ]QPLAPVHNPISV       | 0         | 0         | 0         | 1         | 0         | 1         | 1          | 0          | 1          |

Weeks (W)

| Peptidome derived data                                                                                        |        |        |        |        |        |        |         |         |         |
|---------------------------------------------------------------------------------------------------------------|--------|--------|--------|--------|--------|--------|---------|---------|---------|
|                                                                                                               | Week 1 | Week 2 | Week 3 | Week 4 | Week 6 | Week 8 | Week 10 | Week 12 | Week 16 |
| <sup>190</sup> AVPVQALLLNQELLNPTHQIYPVTQPLAPVHNPISV <sub>226</sub>                                            |        |        |        |        |        |        |         |         |         |
| AVPVQALLLNQELLNPT[N <sub>1</sub> H <sub>1</sub> ]HQIYPVTQPLAPVHNPISV                                          | 3      | 3      | 3      | 2      | 2      | 1      | 1       | 1       | 1       |
| AVPVQALLLNQELLNPT[N <sub>1</sub> H <sub>1</sub> ]HQIYPVT[N <sub>1</sub> H <sub>1</sub> ]QPLAPVHNPISV          | 5      | 5      | 8      | 8      | 7      | 5      | 5       | 4       | 5       |
| <sup>195</sup> ALLLNQELLNPTHQIYPVTQPLAPVHNPISV <sub>226</sub>                                                 |        |        |        |        |        |        |         |         |         |
| ALLLNQELLNPT[N <sub>1</sub> H <sub>1</sub> ]HQIYPVT[N <sub>1</sub> H <sub>1</sub> ]QPLAPVHNPISV               | 5      | 3      | 4      | 12     | 8      | 5      | 3       | 6       | 5       |
| <sup>196</sup> LLLNQELLNPTHQIYPVTQPLAPVHNPISV <sub>226</sub>                                                  |        |        |        |        |        |        |         |         |         |
| LLLNQELLNPT[N <sub>1</sub> H <sub>1</sub> ]HQIYPVTQPLAPVHNPISV                                                | 6      | 6      | 0      | 1      | 25     | 1      | 2       | 2       | 4       |
| LLLNQELLNPT[N <sub>1</sub> H <sub>1</sub> ]HQIYPVT[N <sub>1</sub> H <sub>1</sub> ]QPLAPVHNPISV                | 4      | 7      | 2      | 1      | 27     | 2      | 4       | 3       | 5       |
| LLLNQELLNPT[N <sub>1</sub> H <sub>1</sub> ]HQIYPVT[N <sub>1</sub> H <sub>1</sub> S <sub>1</sub> ]QPLAPVHNPISV | 10     | 11     | 0      | 0      | 9      | 1      | 1       | 1       | 1       |
| <sup>197</sup> LLNQELLNPTHQIYPVTQPLAPVHNPISV <sub>226</sub>                                                   |        |        |        |        |        |        |         |         |         |
| LLNQELLNPT[N <sub>1</sub> H <sub>1</sub> ]HQIYPVTQPLAPVHNPISV                                                 | 9      | 9      | 1      | 1      | 8      | 0      | 1       | 1       | 2       |
| LLNQELLNPT[N <sub>1</sub> H <sub>1</sub> S <sub>1</sub> ]HQIYPVTQPLAPVHNPISV                                  | 4      | 3      | 0      | 0      | 1      | 0      | 0       | 0       | 0       |
| LLNQELLNPT[N <sub>1</sub> H <sub>1</sub> ]HQIYPVT[N <sub>1</sub> H <sub>1</sub> ]QPLAPVHNPISV                 | 10     | 11     | 2      | 2      | 16     | 1      | 2       | 3       | 3       |
| LLNQELLNPT[N <sub>1</sub> H <sub>1</sub> ]HQIYPVT[N <sub>1</sub> H <sub>1</sub> S <sub>1</sub> ]QPLAPVHNPISV  | 8      | 8      | 1      | 0      | 2      | 0      | 0       | 0       | 0       |
| <sup>198</sup> LNQELLNPTHQIYPVTQPLAPVHNPISV <sub>226</sub>                                                    |        |        |        |        |        |        |         |         |         |
| LNQELLNPT[N <sub>1</sub> H <sub>1</sub> S <sub>1</sub> ]HQIYPVTQPLAPVHNPISV                                   | 1      | 1      | 0      | 0      | 0      | 0      | 0       | 0       | 0       |
| LNQELLNPT[N <sub>1</sub> H <sub>1</sub> ]HQIYPVT[N <sub>1</sub> H <sub>1</sub> ]QPLAPVHNPISV                  | 4      | 7      | 1      | 1      | 7      | 1      | 1       | 1       | 2       |
| LNQELLNPT[N <sub>1</sub> H <sub>1</sub> S <sub>1</sub> ]HQIYPVT[N <sub>1</sub> H <sub>1</sub> ]QPLAPVHNPISV   | 3      | 3      | 0      | 0      | 1      | 0      | 0       | 0       | 0       |
| <sup>199</sup> NOELLNPTHQIYPVTOPLAPVHNPISV <sub>226</sub>                                                     |        |        |        |        |        |        |         |         |         |

|                                                                       |   |   |   |   |    |   |   |   |   |
|-----------------------------------------------------------------------|---|---|---|---|----|---|---|---|---|
| NQELLLNPT[N <sub>1</sub> H <sub>1</sub> ]HQ<br>IYPVTQPLAPVHNPI<br>SV  | 1 | 2 | 0 | 0 | 2  | 0 | 0 | 1 | 1 |
| 200QELLLNPTHQIYPVTQPLAPVHNPI SV <sub>226</sub>                        |   |   |   |   |    |   |   |   |   |
| QELLLNPT[N <sub>1</sub> ]HQIYP<br>VT[N <sub>1</sub> ]QPLAPVHNPI<br>SV | 1 | 2 | 2 | 1 | 37 | 2 | 1 | 1 | 6 |

Weeks (W)

Supplemental Table S6: Comparative average glycosylation occupancy percentage data from Byonic PSM counts and Skyline MS1 integration of the peptidome and proteome data.

| <b>Peptidome Glycosylation Data</b> |           |           |           |           |           |           |            |            |            |
|-------------------------------------|-----------|-----------|-----------|-----------|-----------|-----------|------------|------------|------------|
|                                     | <b>W1</b> | <b>W2</b> | <b>W3</b> | <b>W4</b> | <b>W6</b> | <b>W8</b> | <b>W10</b> | <b>W12</b> | <b>W16</b> |
| <b>Donor one PSM counts</b>         |           |           |           |           |           |           |            |            |            |
| <b>Average percentage</b>           | 10        | 11        | 9         | 8         | 13        | 2         | 7          | 3          | 1          |
| <b>Donor one MS1 intensities</b>    |           |           |           |           |           |           |            |            |            |
| <b>Average percentage</b>           | 5         | 5         | 2         | 2         | 10        | 1         | 1          | 2          | 2          |
| <b>Proteome Glycosylation Data</b>  |           |           |           |           |           |           |            |            |            |
|                                     | <b>W1</b> | <b>W2</b> | <b>W3</b> | <b>W4</b> | <b>W6</b> | <b>W8</b> | <b>W10</b> | <b>W12</b> | <b>W16</b> |
| <b>Donor one PSM counts</b>         |           |           |           |           |           |           |            |            |            |
| <b>Average percentage</b>           | 13        | 9         | 8         | 9         | 5         | 12        | 7          | 7          | 10         |
| <b>Donor one MS1 intensities</b>    |           |           |           |           |           |           |            |            |            |
| <b>Average percentage</b>           | 5         | 5         | 7         | 11        | 4         | 8         | 7          | 8          | 9          |

\* PSM count percentages and MS1 intensity percentages were curated from all possible PSMs from modified peptides with glycosylation at sites Thr207 or Thr214, from Supplemental Table 7. Data was matched by donor one, weeks 1-16, peptidome or proteome data, peptide sequences (ladder peptides from 190-226 to 200-226), glycan species (N<sub>1</sub>, N<sub>1</sub>H<sub>1</sub>, N<sub>1</sub>H<sub>1</sub>S<sub>1</sub>), and fragmentation type (EThcD). The only differences in the curation of the datasets was the score filtering, where PSM counts had Byonic Score  $\geq$  150, log probability  $\geq$  1.5 and Delta Mod Score > 5 and Skyline data had idot values  $\geq$  0.85.

Supplemental Table S7: Oxonium ions for mass spectrometry identification

| Oxonium ions    | m/z      |
|-----------------|----------|
| Hex             | 127.0390 |
| Hex             | 145.0495 |
| Hex             | 163.0601 |
| PHex            | 243.0264 |
| PHex            | 405.0793 |
| HexNAc          | 138.0550 |
| HexNAc          | 168.0655 |
| HexNAc          | 186.0761 |
| HexNAc          | 204.0867 |
| Neu5Ac          | 274.0921 |
| Neu5Ac          | 292.1027 |
| HexHexNAc       | 366.1395 |
| HexNAcHexNAc    | 407.1660 |
| HexHexNAcdHex   | 512.1974 |
| HexHexNAcNeu5Ac | 657.2349 |

Supplemental Table S8: Glycan species used for Byonic identifications

| Glycan name                    | Short name                                                  | Chemical name                                                  | Mass (Da) |
|--------------------------------|-------------------------------------------------------------|----------------------------------------------------------------|-----------|
| HexNAc(1)                      | N <sub>1</sub>                                              | H <sub>13</sub> C <sub>8</sub> N <sub>1</sub> O <sub>5</sub>   | 203.08    |
| HexNAc(1)dHex(1)               | N <sub>1</sub> F <sub>1</sub>                               | H <sub>23</sub> C <sub>14</sub> N <sub>1</sub> O <sub>9</sub>  | 349.14    |
| HexNAc(1)Hex(1)                | N <sub>1</sub> H <sub>1</sub>                               | H <sub>23</sub> C <sub>14</sub> N <sub>1</sub> O <sub>10</sub> | 365.13    |
| HexNAc(1)NeuAc(1)              | N <sub>1</sub> S <sub>1</sub>                               | H <sub>30</sub> C <sub>19</sub> N <sub>2</sub> O <sub>13</sub> | 494.17    |
| HexNAc(1)Hex(1)dHex(1)         | N <sub>1</sub> H <sub>1</sub> F <sub>1</sub>                | H <sub>33</sub> C <sub>20</sub> N <sub>1</sub> O <sub>14</sub> | 511.19    |
| HexNAc(1)Hex(1)NeuAc(1)        | N <sub>1</sub> H <sub>1</sub> S <sub>1</sub>                | H <sub>40</sub> C <sub>25</sub> N <sub>2</sub> O <sub>18</sub> | 656.23    |
| HexNAc(1)Hex(1)dHex(2)         | N <sub>1</sub> H <sub>1</sub> F <sub>2</sub>                | H <sub>43</sub> C <sub>26</sub> N <sub>1</sub> O <sub>18</sub> | 657.25    |
| HexNAc(1)Hex(1)dHex(1)NeuAc(1) | N <sub>1</sub> H <sub>1</sub> F <sub>1</sub> S <sub>1</sub> | H <sub>50</sub> C <sub>31</sub> N <sub>2</sub> O <sub>22</sub> | 802.29    |
| HexNAc(1)Hex(1)NeuAc(2)        | N <sub>1</sub> H <sub>1</sub> S <sub>2</sub>                | H <sub>57</sub> C <sub>36</sub> N <sub>3</sub> O <sub>26</sub> | 947.32    |



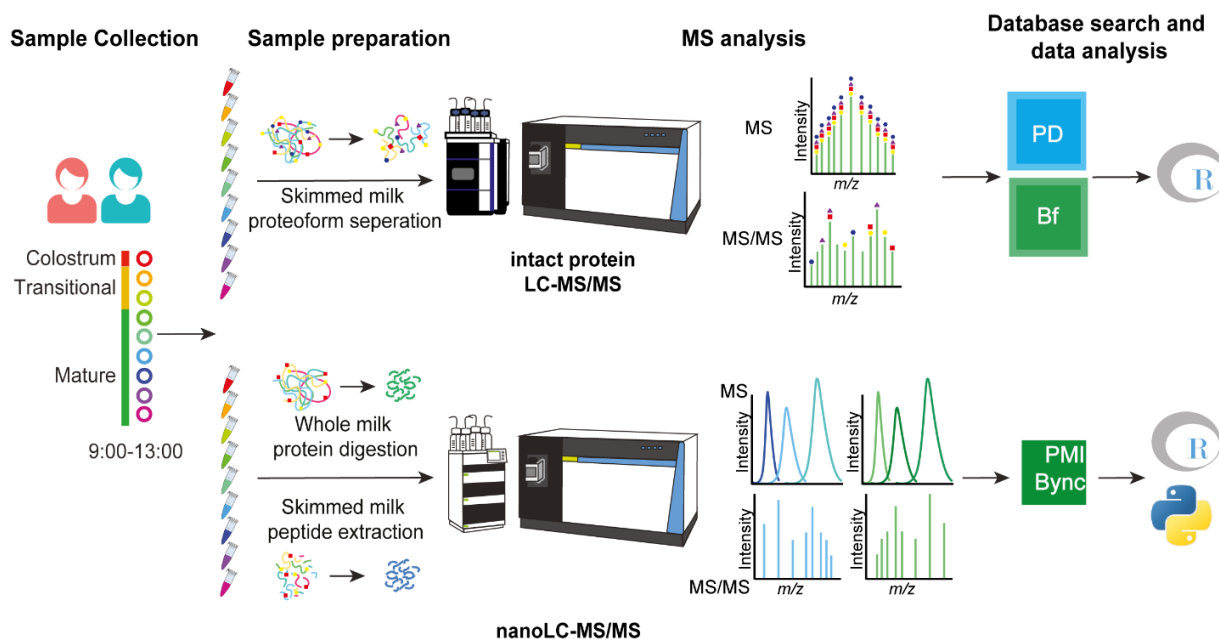

**Supplemental Figure 1: Experimental scheme for personalized human milk PTM profiling.** Samples from two individual donors were collected across lactation from weeks 1 to 16. Human milk proteoforms were first extracted and analyzed by intact protein LC-MS/MS, followed by protein and endogenous peptide extraction and analysis by label free quantification (LFQ) using LC-MS/MS in triplicate. All LFQ samples were ran as MS triplicates with varying MS/MS fragmentation types as higher-energy collisional dissociation (HCD), HCD-product-dependent stepping collision energy HCD (HCD-pd-sHCDs) and HCD-product-dependent electron-transfer/higher-energy collision dissociation (HCD-pd-ET<sub>h</sub>cD). For intact proteoform analysis, isotopically resolved and unresolved spectra were deconvoluted with the BioPharma Finder software using Xtract or ReSpect algorithms respectively. For high-resolution proteoform MS/MS experiments, automatic searches were made in Thermo Proteome Discoverer software using ProSightPD nodes. All LFQ raw files obtained for the glycopeptide identification were processed in Byonic searching against a human  $\beta$ -casein protein database. For glycan analysis a database of 9 core 1 glycans was used. All data processing was done with Anaconda3 distribution of Python or R.

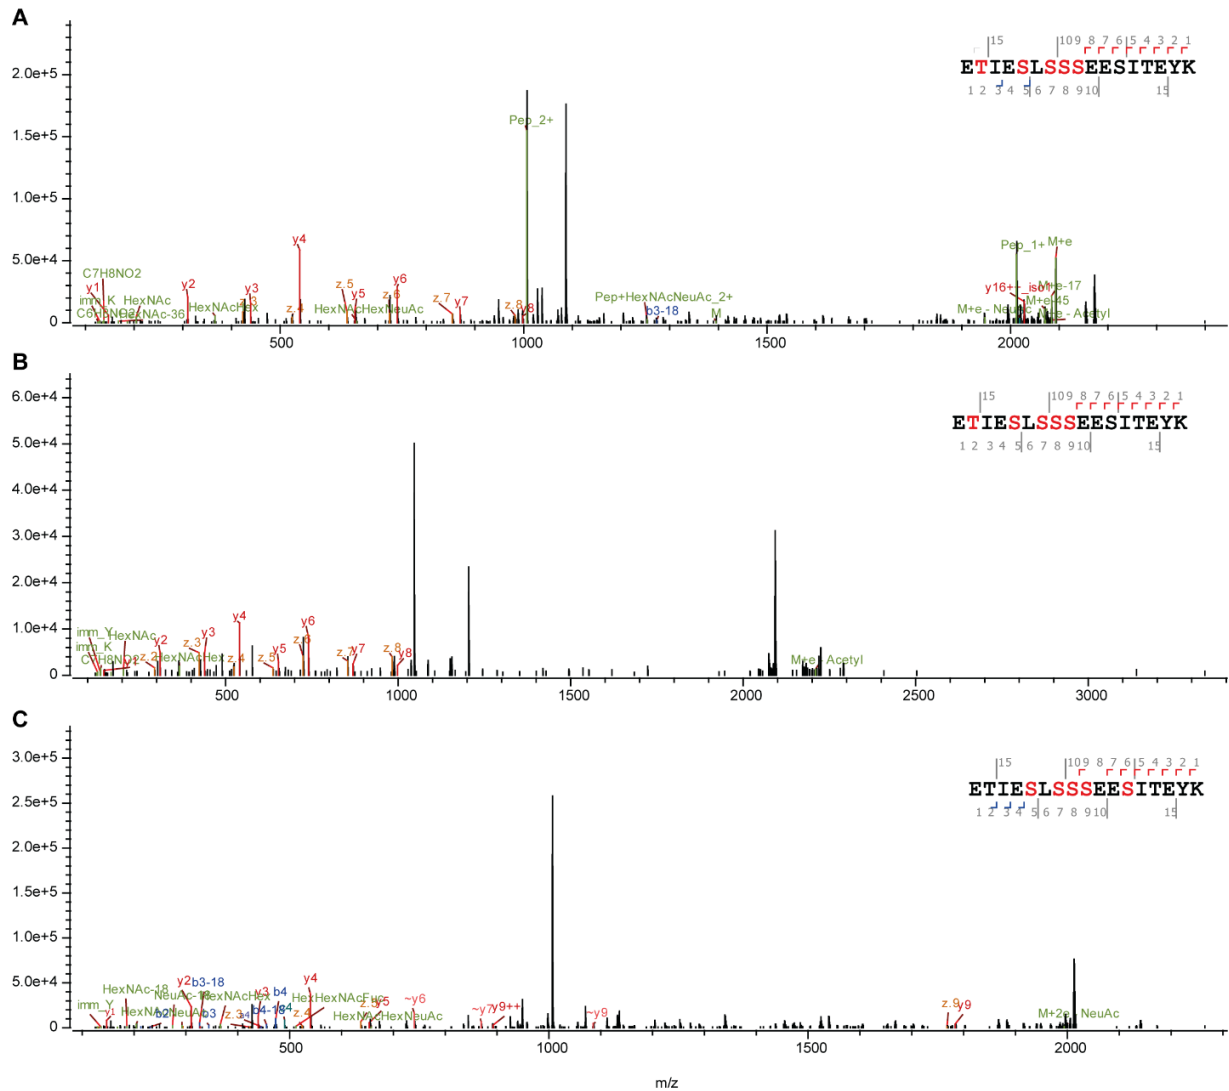

### Supplemental Figure 2: EThcD fragmentation spectra of the N-terminal $\beta$ -casein peptide

${}_{17}\text{ETIESLSSEESITEYK}_{33}$  with negative O-glycan characteristics. All spectra are from donor one, week 16 peptidome data and passed through the strict filtering criteria. **A-C)** EThcD spectra with major abundant peaks unannotated, large indicated glycans on more than three sites (A)  $\text{N}_1\text{H}_1\text{S}_2$ ,  $\text{N}_1\text{S}_1$ ,  $\text{N}_1\text{H}_1$ ,  $\text{P}$ ,  $\text{N}_1\text{H}_1\text{F}_2$  B)  $\text{N}_1\text{H}_1\text{S}_2$  on 5 sites C)  $\text{N}_1\text{H}_1\text{S}_2$ ,  $\text{N}_1\text{F}_1$  on 4 sites ) without corresponding oxonium ions and an absence of peptide fragments with retained phospho-/glyco- modifications.

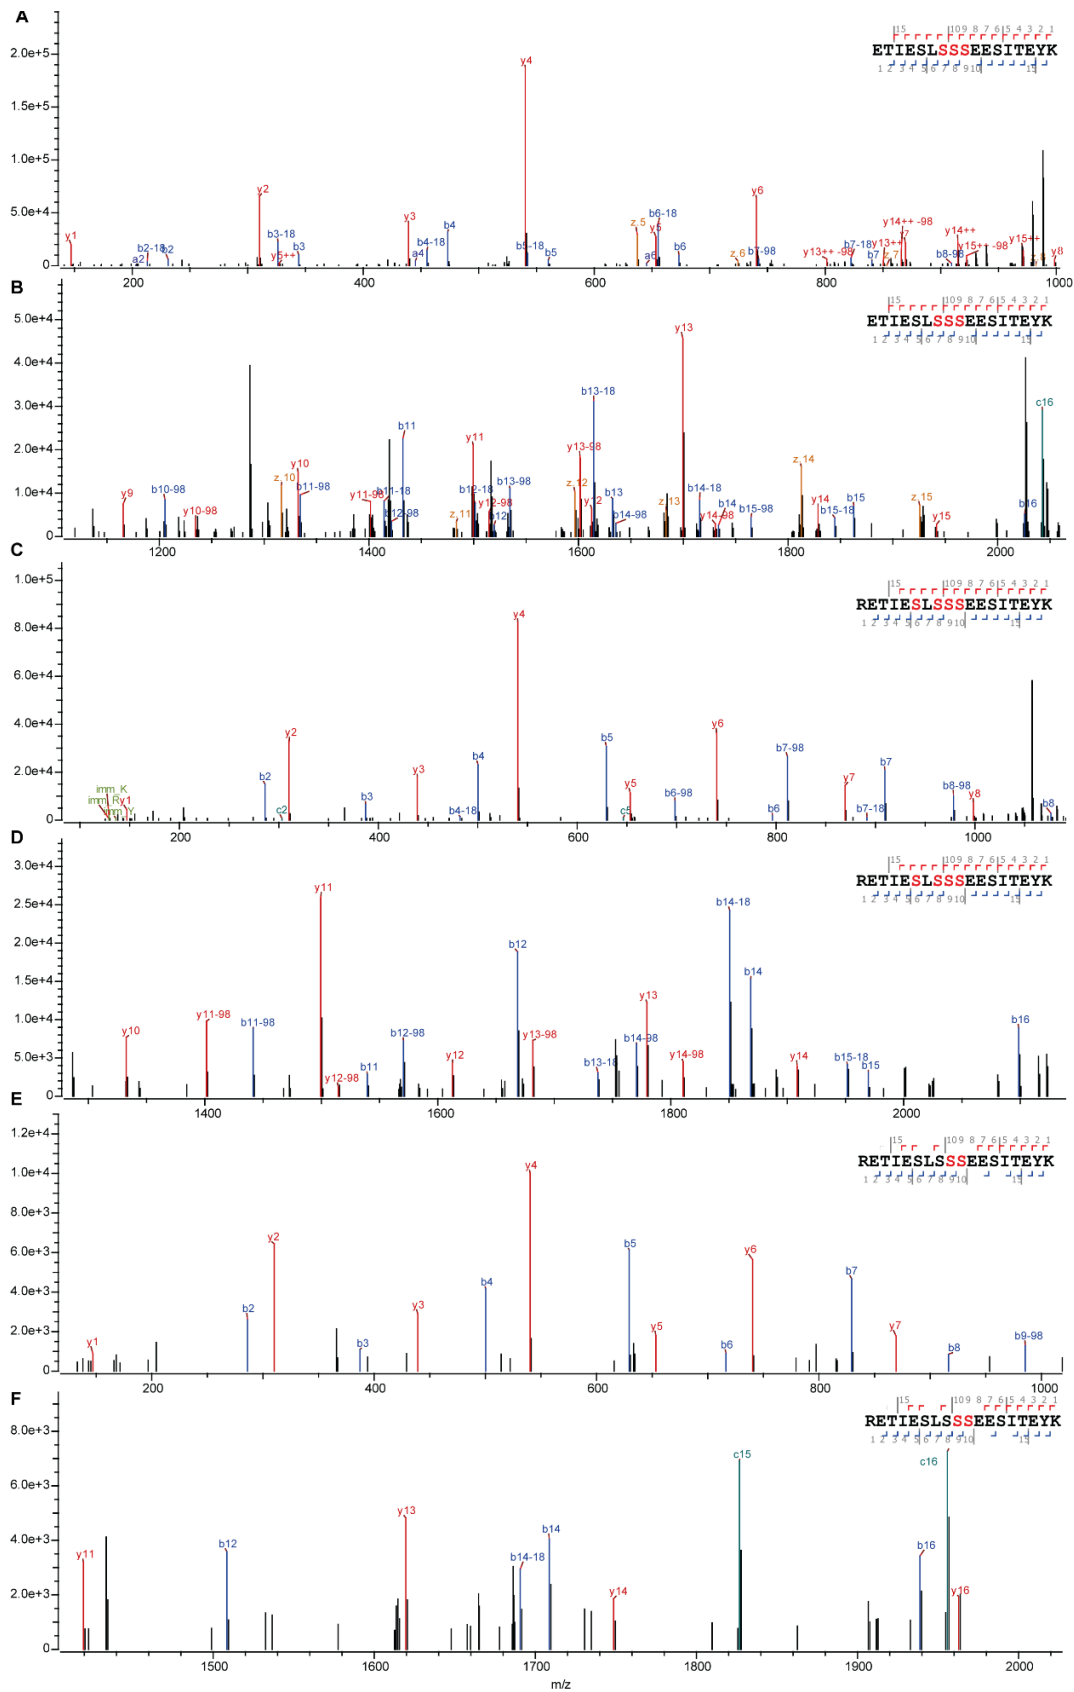

**Supplemental Figure 3: Illustrative EThcD fragmentation spectra of  $\beta$ -casein phosphopeptides zoomed in regions.** The N-terminal phospho peptides in figure 3 contain low intensity regions relative to the most intense ions, here these low intensity regions are displayed. **A)** Zoomed in region from  $m/z$  100 to 1000 of the peptidome peptide with 3 phosphorylated Ser residues. **B)** Zoomed in region from  $m/z$  1100 to 2000 of the peptidome peptide with 3 phosphorylated Ser residues. **C)** Zoomed in region from  $m/z$  100 to 1000 of the peptidome peptide with 4 phosphorylated Ser residues. **D)** Zoomed in region from  $m/z$  1300 to 2000 of the peptidome peptide with 4 phosphorylated Ser residues. **E)** Zoomed in region from  $m/z$  100 to 1000 of the proteome peptide with 2 phosphorylated Ser residues. **F)** Zoomed in region from  $m/z$  1400 to 2000 of the proteome peptide with 2 phosphorylated Ser residues. Designated phosphosites are indicated as red amino acids in the peptide sequence. Confidence in the phosphosite annotations are evident from the precursor mass with the neutral loss of phosphorylation from Ser ( $M-98$  Da) upon fragmentation, with additional b- and y-ions from the peptide backbone placing the -98 Da at specific Ser residues.

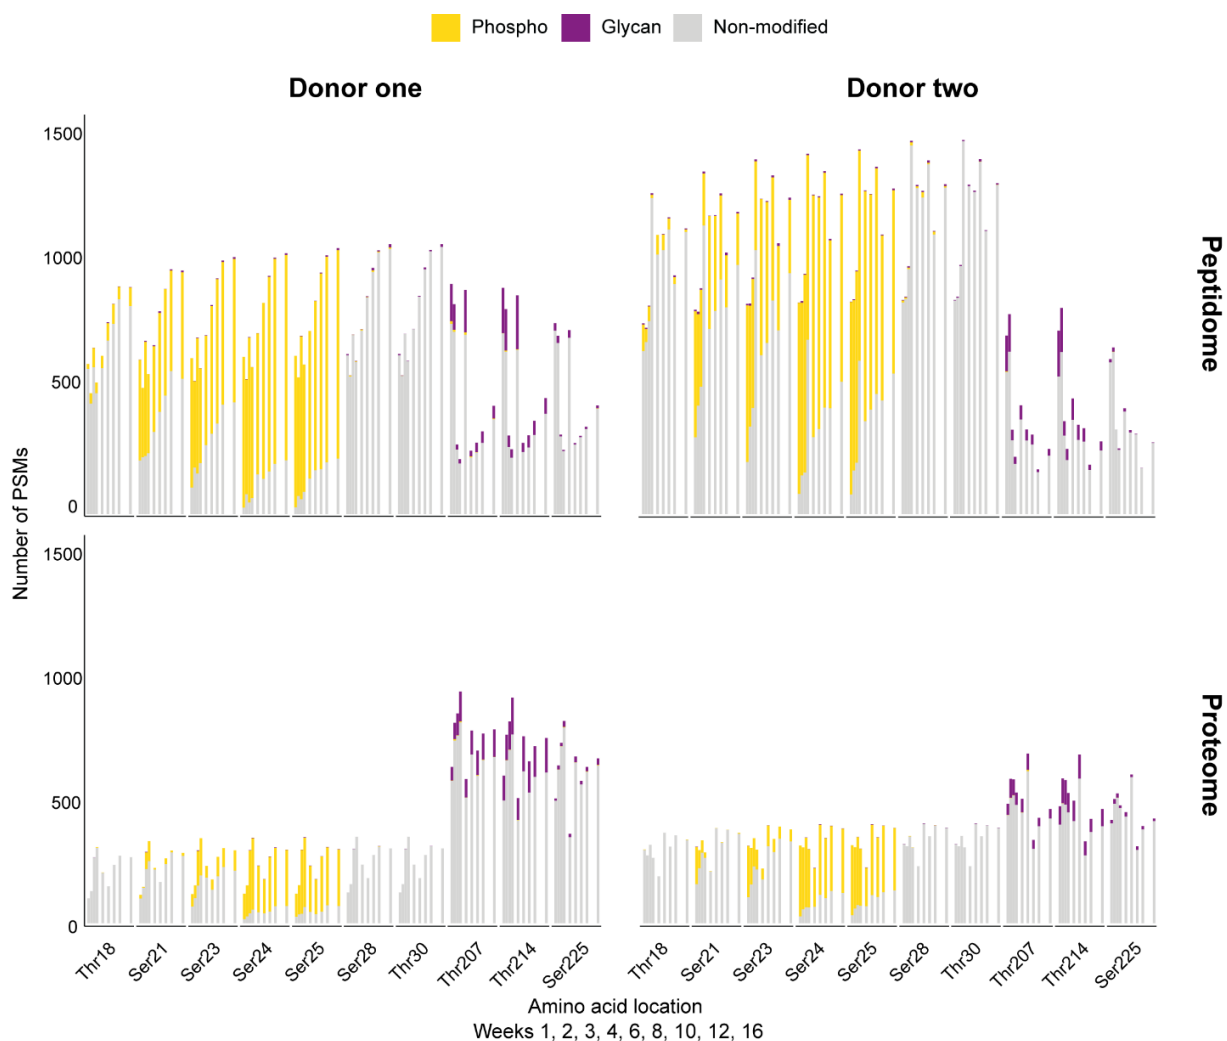

**Supplemental Figure 4: PSM-based comparison of phosphorylated and glycosylated sites in the peptidome and proteome across lactation.** The PTMs across lactation are displayed for the peptidome and proteome at the indicated Ser and Thr sites across the protein backbone for donors one (left) and two (right). PTMs are displayed as stacked bars of non-modified to modified PSMs per site across all points in lactation. Each stacked bar represents the number of identified PSMs for non-modified peptides (grey), modified phosphopeptides (yellow) and glycopeptides (purple). Donor specific and lactations trends indicate that PTMs are highly individual specific, though overall the peptidome displays a greater relative abundance of phosphorylated and glycosylated amino acids than the proteome.

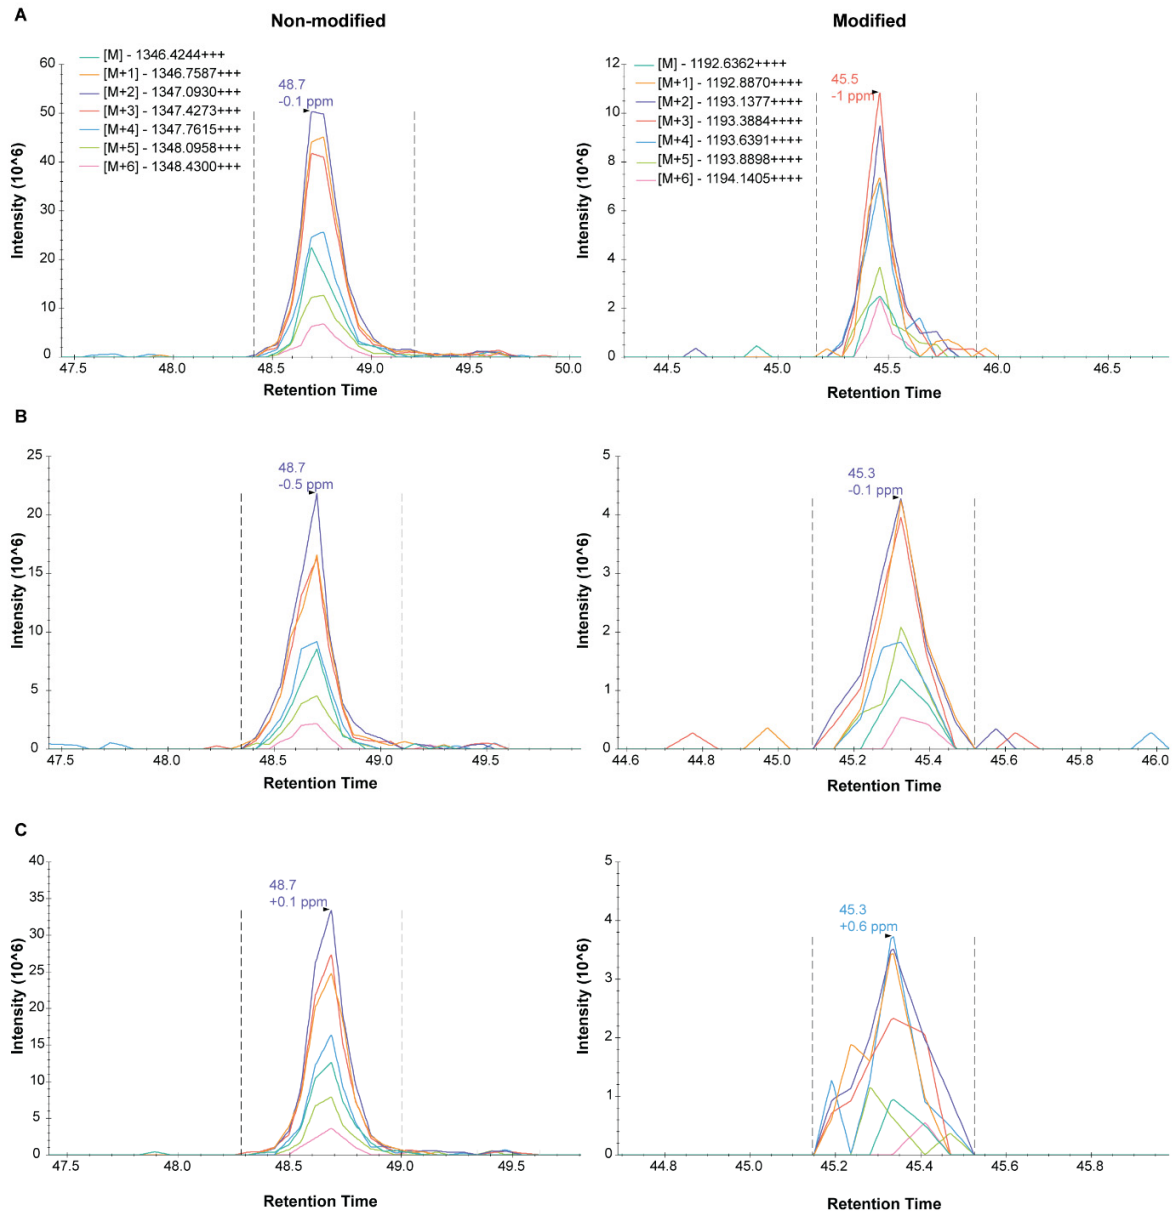

**Supplemental Figure 5: MS1 ion traces of non-modified and modified C-terminal  $\beta$ -casein peptide  ${}_{190}\text{AVPVQALLNQELLNPTHQIYPVTQPLAPVHNPISV}{}_{226}$  to validate glycan species quantification.** All ion traces were extracted using Skyline software suite and are from donor one EThcD spectra across weeks 1, 6 and 16 of lactation for the non-modified (left) and glycosylated (right) peptide. The glycopeptide depicted at every time point has both sites Thr207 and Thr214 occupied with  $\text{N}_1\text{H}_1$ . The depicted ion traces show confident and reproducible integration of both the non-modified and glycosylated peptide with highly accurate retention times and low ppm error. **A)** The C-terminal  $\beta$ -casein peptide at week 1 of lactation. **B)** Peptide at week 6 of lactation **C)** Peptide at week 16 of lactation.

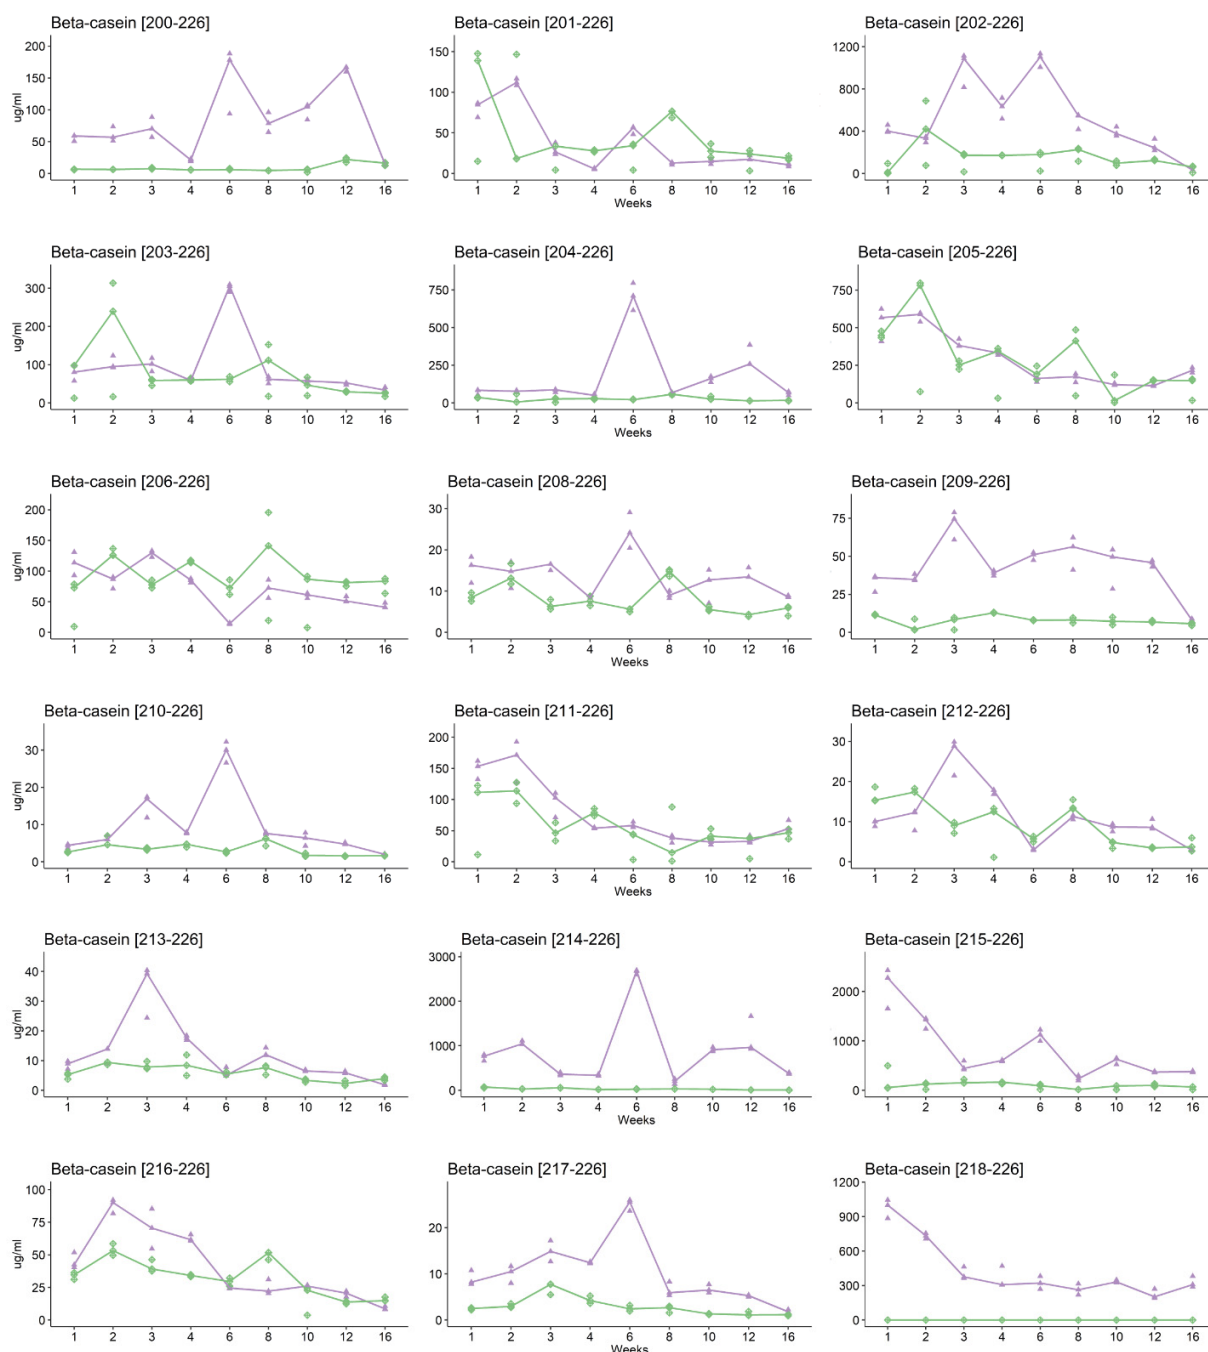

**Supplemental Figure 6: Abundances in the peptidome of putative antimicrobial C-terminal  $\beta$ -casein peptides.** Non-modified peptides were detected in both donors. Data for donor one and two are depicted in purple and green, respectively. Data points indicate the values of each technical replicate, lines are linked by the median of the data points in each week for each donor. The data show that every

ladder peptide has a different concentration in human milk and a distinctive longitudinal pattern. These ladder peptides may potentially also exhibit different functionality.
